# Supplementary material for: Preparation, identification and molecular docking study of novel osteoblast proliferation-promoting peptides from yak (Bos grunniens) bones
Source: PubMed Central journal article supplement — RSC Adv. 2019 May 10;9(26):14627–37. doi: 10.1039/c9ra00945k (PMC9064140; doi:10.1039/c9ra00945k), 2019-05-10
Supplement: RA-009-C9RA00945K-s001.pdf [file RA-009-C9RA00945K-s001.pdf]

## Supplementary Material

**Table S1.** RMSD value between EGFR and native ligand of IIVO after molecular docking using CDOCKER, LibDock and LigandFit docking algorithm

| No. | CDOCKER |           |                | LibDock |           |                | LigandFit |           |                |
|-----|---------|-----------|----------------|---------|-----------|----------------|-----------|-----------|----------------|
|     | Pose    | Reference | RMSD value (Å) | Pose    | Reference | RMSD value (Å) | Pose      | Reference | RMSD value (Å) |
| 1   | IIVO-1  | IIVO-1    | 0.0000         | IIVO-1  | IIVO-1    | 0.0000         | IIVO-1    | IIVO-1    | 0.0000         |
| 2   | IIVO-2  | IIVO-1    | 3.2411         | IIVO-2  | IIVO-1    | 13.4153        | IIVO-2    | IIVO-1    | 1.6592         |
| 3   | IIVO-3  | IIVO-1    | 1.9480         | IIVO-3  | IIVO-1    | 17.4821        | IIVO-3    | IIVO-1    | 7.2496         |
| 4   | IIVO-4  | IIVO-1    | 17.1064        |         |           |                | IIVO-4    | IIVO-1    | 9.8477         |
| 5   | IIVO-5  | IIVO-1    | 7.7512         |         |           |                |           |           |                |
| 6   | IIVO-6  | IIVO-1    | 2.9591         |         |           |                |           |           |                |
| 7   | IIVO-7  | IIVO-1    | 13.3061        |         |           |                |           |           |                |
| 8   | IIVO-8  | IIVO-1    | 22.5397        |         |           |                |           |           |                |
| 9   | IIVO-9  | IIVO-1    | 21.1556        |         |           |                |           |           |                |
| 10  | IIVO-10 | IIVO-1    | 11.4168        |         |           |                |           |           |                |
| 11  | IIVO-11 | IIVO-1    | 15.5136        |         |           |                |           |           |                |

**Table S2.** The Box-Behnken experimental design and the response for the SCP

| Run order | Independent variable |                  |           |     | Soluble peptides content (mg/mL) |           |
|-----------|----------------------|------------------|-----------|-----|----------------------------------|-----------|
|           | Time (h)             | Temperature (°C) | E/S (U/g) | pH  | Experimental                     | Predicted |
| 1         | 3.5                  | 45               | 6000      | 7.5 | 0.3985                           | 0.3895    |
| 2         | 3.5                  | 45               | 6500      | 7.0 | 0.3083                           | 0.3200    |
| 3         | 3.5                  | 50               | 6000      | 7.0 | 0.4879                           | 0.4900    |
| 4         | 3.5                  | 50               | 6000      | 7.0 | 0.4898                           | 0.4900    |
| 5         | 4.5                  | 50               | 6500      | 7.0 | 0.3825                           | 0.3806    |
| 6         | 4.0                  | 50               | 5500      | 7.5 | 0.4351                           | 0.4345    |
| 7         | 3.5                  | 50               | 6000      | 7.5 | 0.4326                           | 0.4260    |
| 8         | 4.5                  | 55               | 6000      | 7.0 | 0.4531                           | 0.4466    |
| 9         | 4.5                  | 50               | 6000      | 6.5 | 0.4263                           | 0.4200    |
| 10        | 4.0                  | 55               | 6000      | 7.5 | 0.4569                           | 0.4575    |
| 11        | 4.0                  | 45               | 5500      | 7.0 | 0.3993                           | 0.3780    |
| 12        | 4.0                  | 50               | 5500      | 6.5 | 0.4737                           | 0.4695    |
| 13        | 4.0                  | 45               | 6000      | 6.5 | 0.3741                           | 0.3665    |
| 14        | 3.5                  | 55               | 6000      | 7.0 | 0.4931                           | 0.4874    |
| 15        | 4.0                  | 55               | 6000      | 6.5 | 0.5034                           | 0.5065    |
| 16        | 3.5                  | 45               | 6000      | 7.0 | 0.3622                           | 0.3614    |
| 17        | 4.0                  | 50               | 6500      | 6.5 | 0.3980                           | 0.3895    |
| 18        | 3.5                  | 50               | 6000      | 6.5 | 0.4725                           | 0.4669    |
| 19        | 3.5                  | 50               | 5500      | 7.0 | 0.4608                           | 0.4574    |
| 20        | 4.5                  | 50               | 6000      | 7.5 | 0.4435                           | 0.4351    |
| 21        | 4.0                  | 50               | 6000      | 7.0 | 0.4995                           | 0.4900    |
| 22        | 4.5                  | 50               | 5500      | 7.0 | 0.4163                           | 0.4166    |
| 23        | 4.0                  | 55               | 6500      | 7.0 | 0.4432                           | 0.4240    |
| 24        | 3.5                  | 50               | 6500      | 7.0 | 0.3815                           | 0.3774    |
| 25        | 4.0                  | 50               | 6000      | 7.0 | 0.5037                           | 0.4900    |
| 26        | 4.0                  | 50               | 6500      | 7.5 | 0.4037                           | 0.3985    |
| 27        | 4.0                  | 50               | 6000      | 7.0 | 0.4913                           | 0.4900    |
| 28        | 4.5                  | 45               | 6000      | 7.0 | 0.3677                           | 0.3646    |
| 29        | 4.0                  | 55               | 5500      | 7.0 | 0.4840                           | 0.4820    |

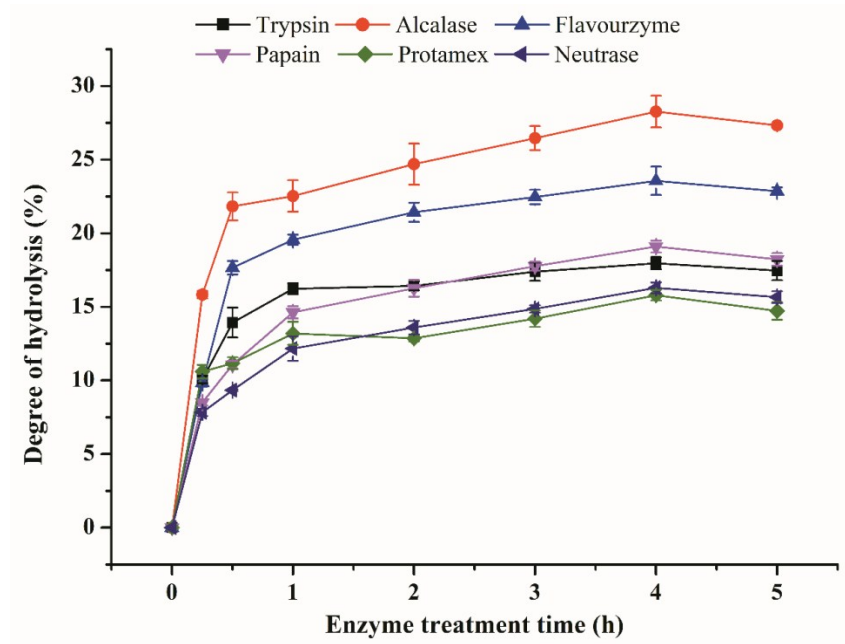

**Fig. S1** Degree of hydrolysis of yak bone collagen by the six different enzymes during 5 hours

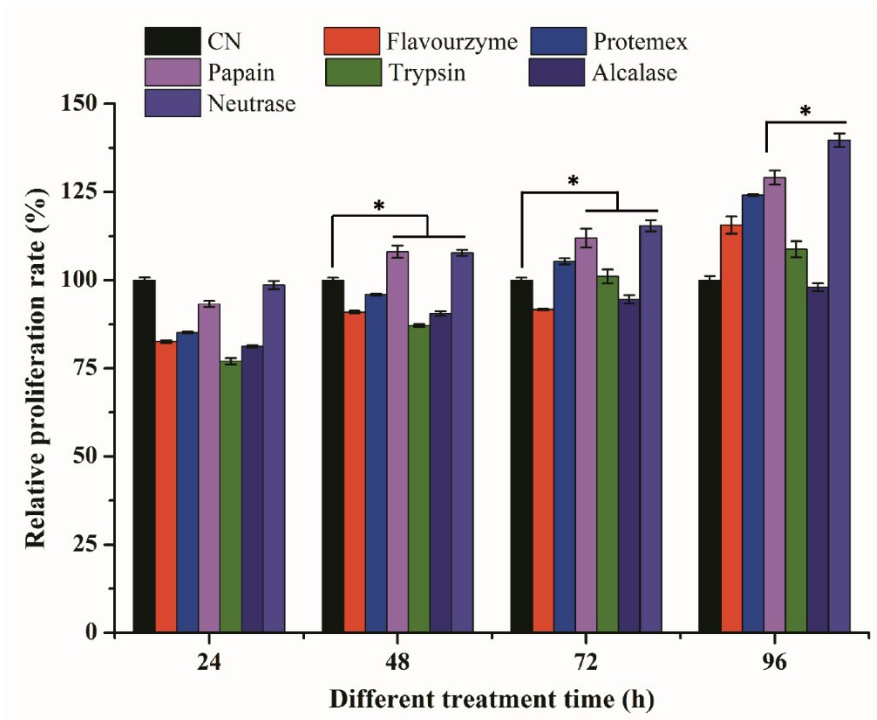

**Fig. S2** Comparison the effect of six different enzymes hydrolysates on OPPA (asterisks indicate significant differences compared with control group at  $P < 0.05$ )

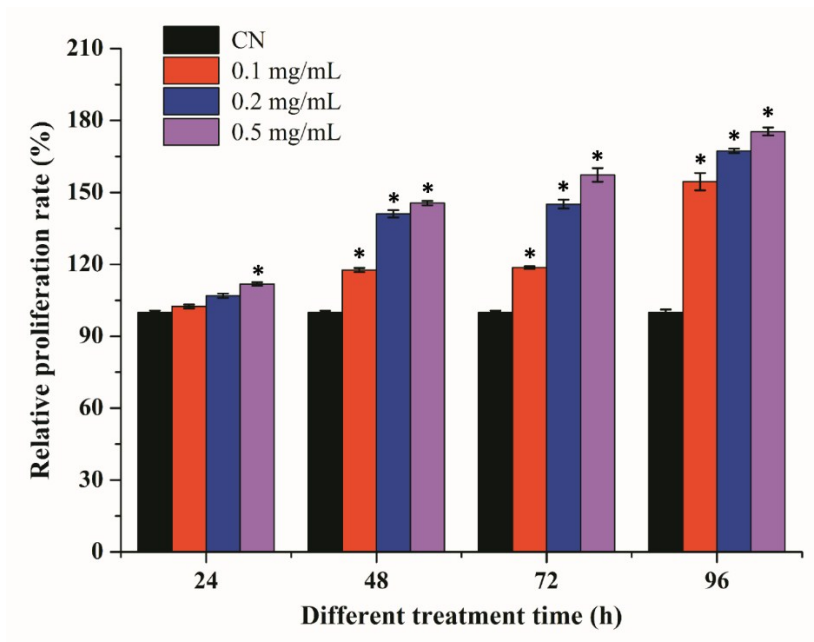

**Fig. S3** The OPPA of peptides (0.1, 0.2 and 0.5 mg/mL) at different culture time (asterisks indicate significant differences compared with control group at  $P < 0.05$ )

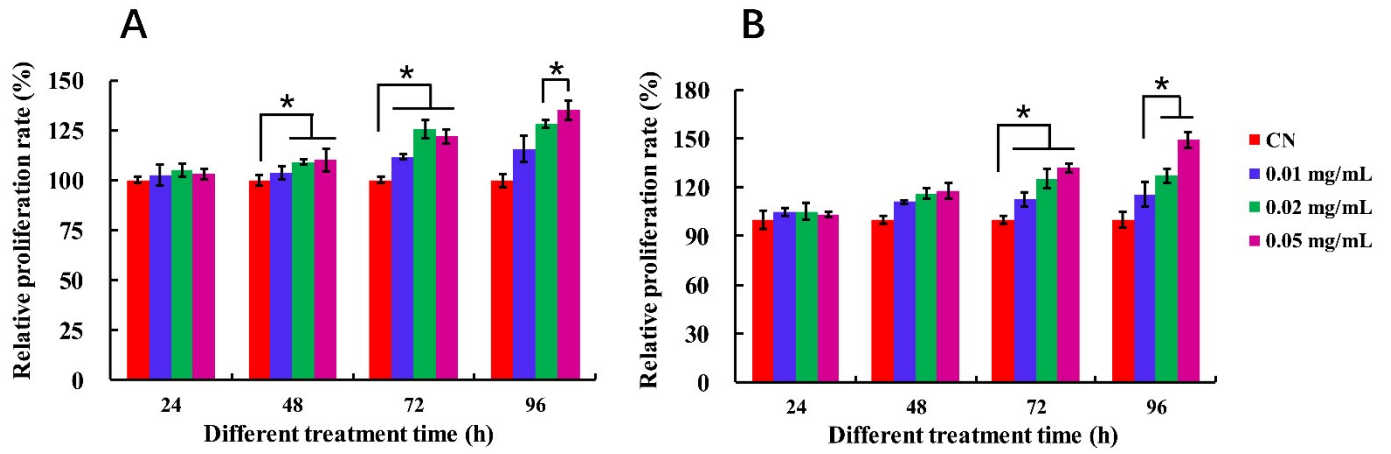

**Fig. S4** The OPPA of the synthetic peptides (GP-16 and GD-18) (0.01, 0.02 and 0.05 mg/mL) at different culture time. (A) Synthetic peptide GP-16; (B) Synthetic peptide GD-18 (asterisks indicate significant differences compared with control group at  $P < 0.05$ )
